# Supplementary material
Source: MDPI journal article supplement (https://www.mdpi.com/1996-1073/14/16/4764)
Supplement: s1 [file s1]

**Table S1. Implemented numerical wave models in the assessment of wave energy potential.**

| Geographical Area                            | Period    | Numerical Wave model | Part of the Mediterranean Sea | Authors |
|----------------------------------------------|-----------|----------------------|-------------------------------|---------|
| Mediterranean Sea                            | 2001-2010 | WAM                  | Entire                        | [1]     |
| Mediterranean Sea                            | 1979-2013 | WavewatchIII         | Entire                        | [2]     |
| Mediterranean Sea                            | 2011-2014 | WavewatchIII         | Entire                        | [3]     |
| Mediterranean Sea                            | 1980-2014 | SWAN                 | Entire                        | [4]     |
| Eastern Mediterranean Sea and Aegean Sea     | 1994-2009 | Mike 21 SW           | Eastern                       | [5]     |
| Libyan Sea                                   | 1980-2014 | SWAN                 | Eastern                       | [6]     |
| Aegean Sea                                   | 1980-2014 | SWAN                 | Eastern                       | [7]     |
| Varkiza Coasts                               | 2012-2013 | WAM                  | Eastern                       | [8]     |
| Chania's Venetian harbour Coast              | 2011-2012 | MIKE 21 BW           | Eastern                       | [9]     |
| Aegean Sea                                   | 1999-2013 | MIKE 21 SW           | Eastern                       | [10]    |
| Levantine Sea                                | 2001-2010 | WAM                  | Eastern                       | [11]    |
| Greek Coasts                                 | 1960-2001 | WAM                  | Eastern                       | [12]    |
| Italian Coasts                               | 2001-2010 | WAM                  | Western                       | [13]    |
| North-western Sardinian Coasts               | 1989-2010 | MIKE 21 NSW          | Western                       | [14]    |
| Sicilian Coasts                              | 1999-2012 | SWAN                 | Western                       | [15]    |
| Tuscany, Liguria, Sardinia and Sicily Coasts | 2009-2013 | MED 6MIN, MIKE 21SW  | Western                       | [16]    |
| Northern Latium Coasts                       | 1994-2012 | CMS-Wave             | Western                       | [17]    |
| Algerian Coasts                              | 1979-2017 | SWAN                 | Western                       | [18]    |
| Valearic Sea                                 | 1983-2011 | WAM                  | Western                       | [19]    |
| Sicilian Coasts                              | 1996-2005 | SWAN                 | Western                       | [20]    |

## References

1. Arena, F.; Laface, V.; Malara, G.; Romolo, A.; Viviano, A.; Fiamma, V.; Sannino, G.; Carillo, A. Wave Climate Analysis for the Design of Wave Energy Harvesters in the Mediterranean Sea. *Renewable Energy* **2015**, *77*, doi:10.1016/j.renene.2014.12.002.
2. Besio, G.; Mentaschi, L.; Mazzino, A. Wave Energy Resource Assessment in the Mediterranean Sea on the Basis of a 35-Year Hindcast. *Energy* **2016**, *94*, doi:10.1016/j.energy.2015.10.044.
3. Pelli, D.; Cappietti, L.; Oumeraci, H. Assessing the Wave Energy Potential in the Mediterranean Sea Using WAVEWATCH III. In Proceedings of the Progress in Renewable Energies Offshore - Proceedings of 2nd International Conference on Renewable Energies Offshore, RENEW 2016; 2016.
4. Lavidas, G.; Venugopal, V.; Agarwal, A. Long-Term Evaluation of the Wave Climate and Energy Potential in the Mediterranean Sea. In Proceedings of the Sustainable Hydraulics in the Era of Global Change - Proceedings of the 4th European Congress of the International Association of Hydroenvironment engineering and Research, IAHR 2016; 2016.
5. Ayat, B. Wave Power Atlas of Eastern Mediterranean and Aegean Seas. *Energy* **2013**, *54*, doi:10.1016/j.energy.2013.02.060.
6. Lavidas, G.; Venugopal, V. Wave Energy Resource Evaluation and Characterisation for the Libyan Sea. *International Journal of Marine Energy* **2017**, *18*, doi:10.1016/j.ijome.2017.03.001.
7. Lavidas, G.; Venugopal, V. A 35 Year High-Resolution Wave Atlas for Nearshore Energy Production and Economics at the Aegean Sea. *Renewable Energy* **2017**, *103*, doi:10.1016/j.renene.2016.11.055.

8. Foteinis, S.; Hancock, J.; Mazarakis, N.; Tsoutsos, T.; Synolakis, C.E. A Comparative Analysis of Wave Power in the Nearshore by WAM Estimates and In-Situ (AWAC) Measurements. The Case Study of Varkiza, Athens, Greece. *Energy* **2017**, *138*, doi:10.1016/j.energy.2017.07.061.
9. Spyros Foteinis; Theocharis Tsoutsos; Costas Synolakis Numerical Modelling for Coastal Structures Design and Planning. A Case Study of the Venetian Harbour of Chania, Greece. *International Journal of Geoengineering Case Histories* **2018**, *4*, 232–241.
10. Jadidoleslam, N.; Özger, M.; Ağralioğlu, N. Wave Power Potential Assessment of Aegean Sea with an Integrated 15-Year Data. *Renewable Energy* **2016**, *86*, doi:10.1016/j.renene.2015.09.022.
11. Zodiatis, G.; Galanis, G.; Nikolaidis, A.; Kalogeri, C.; Hayes, D.; Georgiou, G.C.; Chu, P.C.; Kallos, G. Wave Energy Potential in the Eastern Mediterranean Levantine Basin. An Integrated 10-Year Study. *Renewable Energy* **2014**, *69*, doi:10.1016/j.renene.2014.03.051.
12. Zacharioudaki, A.; Korres, G.; Perivoliotis, L. Wave Climate of the Hellenic Seas Obtained from a Wave Hindcast for the Period 1960–2001. *Ocean Dynamics* **2015**, *65*, doi:10.1007/s10236-015-0840-z.
13. Liberti, L.; Carillo, A.; Sannino, G. Wave Energy Resource Assessment in the Mediterranean, the Italian Perspective. *Renewable Energy* **2013**, *50*, doi:10.1016/j.renene.2012.08.023.
14. Vicinanza, D.; Contestabile, P.; Ferrante, V. Wave Energy Potential in the North-West of Sardinia (Italy). *Renewable Energy* **2013**, *50*, doi:10.1016/j.renene.2012.07.015.
15. Iuppa, C.; Cavallaro, L.; Vicinanza, D.; Foti, E. Investigation of Suitable Sites for Wave Energy Converters around Sicily (Italy). *Ocean Science* **2015**, *11*, doi:10.5194/os-11-543-2015.
16. Vannucchi, V.; Cappietti, L. Wave Energy Assessment and Performance Estimation of State of the Art wave Energy Converters in Italian Hotspots. *Sustainability (Switzerland)* **2016**, *8*, doi:10.3390/su8121300.
17. Paladini de Mendoza, F.; Bonamano, S.; Stella, G.; Giovacchini, M.; Capizzi, D.; Fraticelli, F.; Muratore, S.; Burgio, C.; Scanu, S.; Peviani, M.A.; et al. Where Is the Best Site for Wave Energy Exploitation? Case Study along the Coast of Northern Latium (ITALY). *Journal of Coastal Conservation* **2016**, *20*, doi:10.1007/s11852-015-0414-8.
18. Amarouche, K.; Akpınar, A.; Bachari, N.E.I.; Houma, F. Wave Energy Resource Assessment along the Algerian Coast Based on 39-Year Wave Hindcast. *Renewable Energy* **2020**, *153*, doi:10.1016/j.renene.2020.02.040.
19. Ponce de León, S.; Orfila, A.; Simarro, G. Wave Energy in the Balearic Sea. Evolution from a 29 Year Spectral Wave Hindcast. *Renewable Energy* **2016**, *85*, doi:10.1016/j.renene.2015.07.076.
20. Monteforte, M.; lo Re, C.; Ferreri, G.B. Wave Energy Assessment in Sicily (Italy). *Renewable Energy* **2015**, *78*, doi:10.1016/j.renene.2015.01.006.
